# Supplementary material for: P2Y6-deficiency increases micturition frequency and attenuates sustained contractility of the urinary bladder in mice
Source: PubMed Central journal article supplement (PMC5429706; doi:10.1038/s41598-017-00824-2), 2017-04-10
Supplement: 41598_2017_824_MOESM1_ESM.pdf [file 41598_2017_824_MOESM1_ESM.pdf]

## ***Supplementary Information***

### **P2Y<sub>6</sub>-deficiency increases micturition frequency and attenuates sustained contractility of the urinary bladder in mice**

Satoru Kira<sup>1</sup>, Mitsuharu Yoshiyama<sup>1</sup>, Sachiko Tsuchiya<sup>1</sup>, Eiji Shigetomi<sup>2,3</sup>,  
Tatsuya Miyamoto<sup>1</sup>, Hiroshi Nakagomi<sup>1</sup>, Keisuke Shibata<sup>2,3</sup>, Tsutomu Mochizuki<sup>1</sup>,  
Masayuki Takeda<sup>1</sup> & Schuichi Koizumi<sup>2,3</sup>

<sup>1</sup>Department of Urology, University of Yamanashi Graduate School of Medical Science, Yamanashi 409-3898, Japan

<sup>2</sup>Department of Neuropharmacology, University of Yamanashi Graduate School of Medical Science, Yamanashi 409-3898, Japan

<sup>3</sup>Japan Science and Technology Agency, CREST, Tokyo 102-0076, Japan

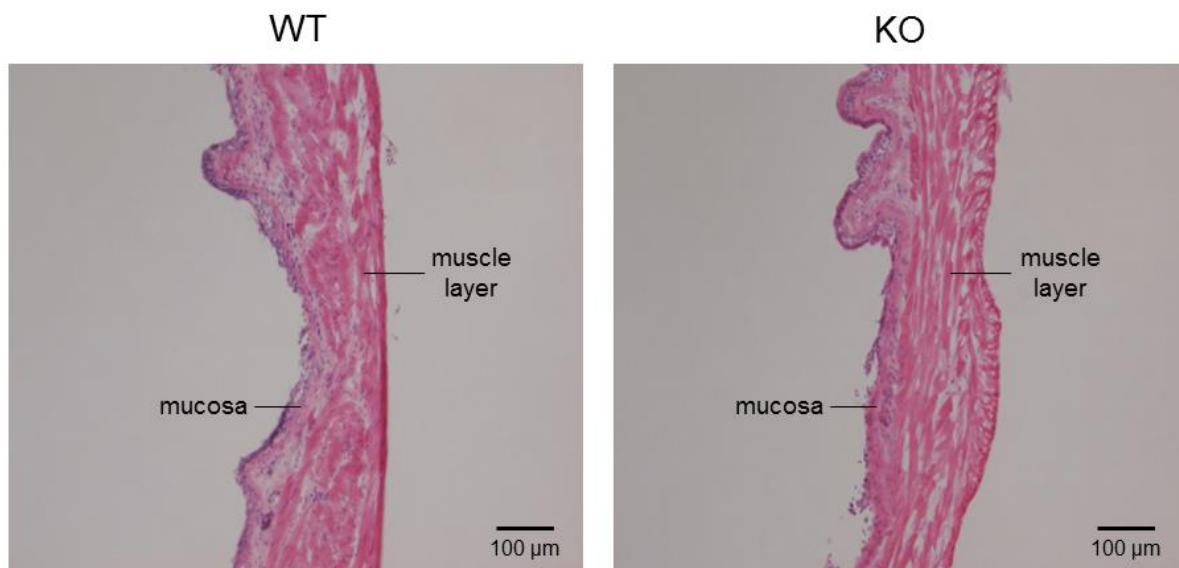

**Figure 1S. Microscopic findings of bladders stained with haematoxylin and eosin (H&E), of a WT mouse and a P2Y<sub>6</sub>-KO mouse**

**Table 1S. The primer sequences for RT-PCR**

| Probe             | Sequence             |
|-------------------|----------------------|
| P2Y <sub>1</sub>  |                      |
| forward           | CTGGGACTCGGAAAAACAAA |
| reverse           | AGATCAGCACCAAAGGGATG |
| P2Y <sub>2</sub>  |                      |
| forward           | CTGTCACCACCCACACAAAG |
| reverse           | ACACACACACACACCCATCC |
| P2Y <sub>4</sub>  |                      |
| forward           | TCCTTTTCCTCACCTGCATC |
| reverse           | AGGCAGCCAGCTACTACCAA |
| P2Y <sub>6</sub>  |                      |
| Forward           | AGGCTGACAGGCAGTTATGG |
| Reverse           | TATACCGGGGTTAGCAGCAG |
| P2Y <sub>12</sub> |                      |
| forward           | GGCTTTGGGAACTTATGCAA |
| reverse           | GTGTTGACACCAGGCACATC |
| P2Y <sub>14</sub> |                      |
| forward           | GAAGAATTCCACCTCCGTCA |
| reverse           | GCACAAAGCAGACGACAAAA |
| P2X <sub>1</sub>  |                      |
| forward           | TGTACGGGGAGAAGAACCTG |
| reverse           | TCCCAAACACCTTGAAGAGG |
| GAPDH             |                      |
| forward           | CACAATTTCCATCCCAGACC |
| reverse           | GTGGGTGCAGCGAACTTTAT |
